# Supplementary material
Source: Springer Nature journal article supplement (https://www.springermedizin.de/resource/supplementary/12985_2010_1064_MOESM3_ESM.pdf/9609062)

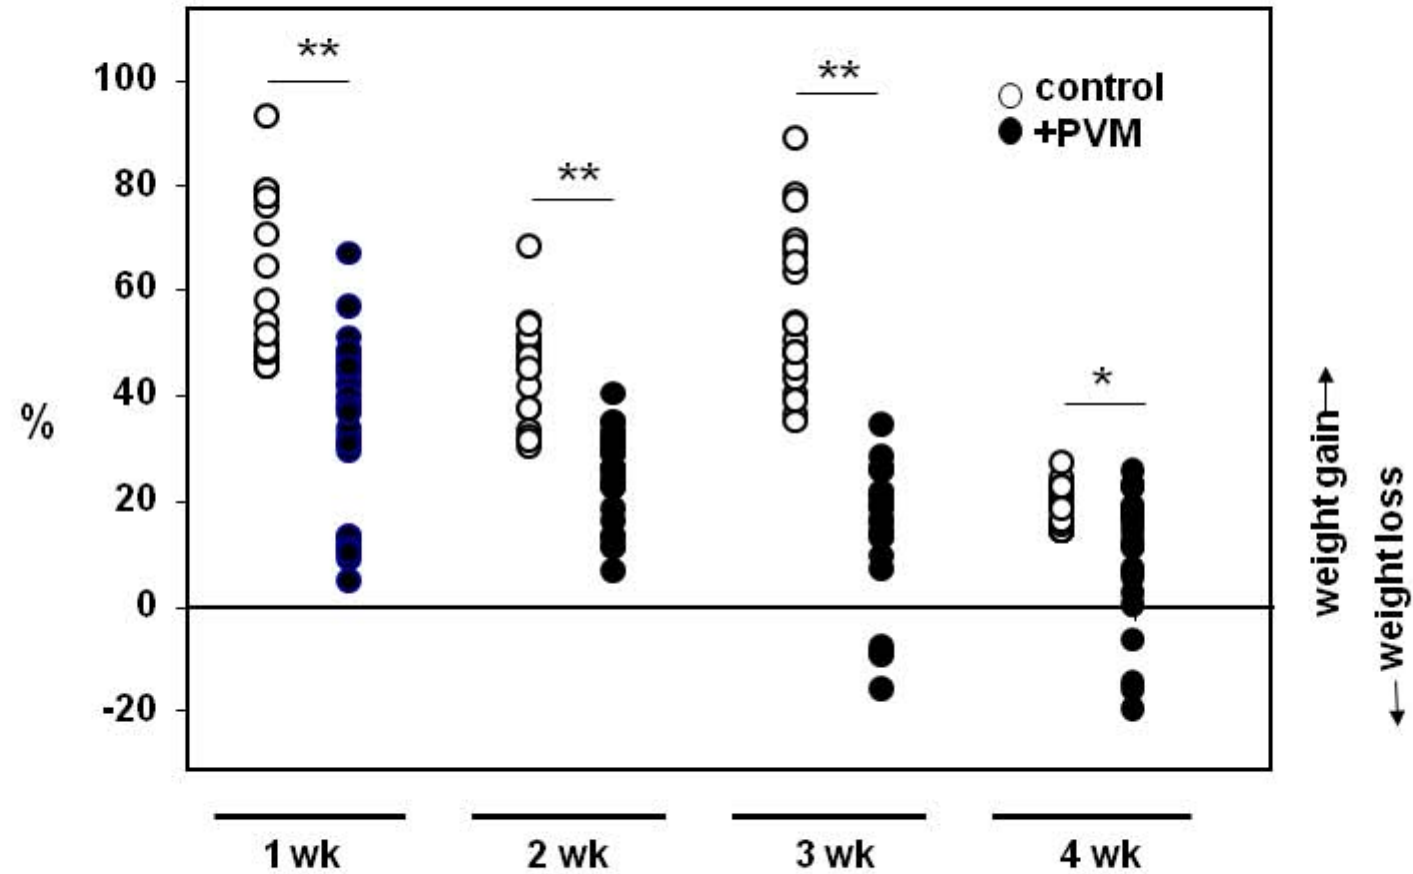

Supplement: MOESM3 [file 9609062]
